# Supplementary material for: Designing for Digital Fabrication: An Empirical Study of Industry Needs, Perceived Benefits, and Strategies for Adoption
Source: Atypon-hosted journal article supplement (doi:10.1061/(asce)me.1943-5479.0001072), 2022-07-13

## SUPPLEMENTAL MATERIALS

*ASCE Journal of Management in Engineering*

# Designing for Digital Fabrication: An Empirical Study of Industry Needs, Perceived Benefits, and Strategies for Adoption

Ming Shan Ng, Qian Chen, Daniel M. Hall,  
Jürgen Hackl, and Bryan T. Adey

**DOI:** 10.1061/(ASCE)ME.1943-5479.0001072

© ASCE 2022

[www.ascelibrary.org](http://www.ascelibrary.org)

Table S1. Example of the heat map visualisation of the contingency tables for A1 pairing A1-A6 answers.

| A1 Which fabrication-related information is the most essential to the design process? |                     |                     |               |                      |                      |                       |                       |                               |       |       |    |       |        |   |       |      |   |        |      |   |      |      |
|---------------------------------------------------------------------------------------|---------------------|---------------------|---------------|----------------------|----------------------|-----------------------|-----------------------|-------------------------------|-------|-------|----|-------|--------|---|-------|------|---|--------|------|---|------|------|
| A1 Which fabrication-related information is the most essential to the design process? |                     |                     |               |                      |                      |                       |                       |                               |       |       |    |       |        |   |       |      |   |        |      |   |      |      |
|                                                                                       | 114                 | 60                  | 68            | 7                    | 71                   | 48                    | 7                     | 2                             | 11    |       |    |       |        |   |       |      |   |        |      |   |      |      |
|                                                                                       | Machine Constraints | Project implication | Machine codes | Design spec & config | Fabrication sequence | Fabrication standards | no information needed | do not know/decline to answer |       |       |    |       |        |   |       |      |   |        |      |   |      |      |
| Machine Constraints                                                                   | 60                  | 37                  | 54.41         | 61.67                | 5                    | 71.43                 | 8.33                  | 36                            | 50.70 | 60.00 | 25 | 52.08 | 41.67  | 2 | 28.57 | 3.33 | 1 | 50.00  | 1.67 | 1 | 9.09 | 1.67 |
| Project implication                                                                   | 68                  | 37                  | 61.67         | 54.41                | 3                    | 42.86                 | 4.41                  | 44                            | 61.97 | 64.71 | 29 | 60.42 | 42.65  | 4 | 57.14 | 5.88 | 1 | 50.00  | 1.47 | 0 | 0.00 | 0.00 |
| Machine codes                                                                         | 7                   | 5                   | 8.33          | 71.43                | 3                    | 4.41                  | 42.86                 | 3                             | 4.23  | 42.86 | 2  | 4.17  | 28.57  | 0 | 0.00  | 0.00 | 0 | 0.00   | 0.00 | 0 | 0.00 | 0.00 |
| Design specification and configuration                                                | 71                  | 36                  | 60.00         | 50.70                | 44                   | 64.71                 | 61.97                 | 3                             | 42.86 | 4.23  | 27 | 56.25 | 38.03  | 5 | 71.43 | 7.04 | 2 | 100.00 | 2.82 | 0 | 0.00 | 0.00 |
| Fabrication sequence                                                                  | 48                  | 25                  | 41.67         | 52.08                | 29                   | 42.65                 | 60.42                 | 2                             | 28.57 | 4.17  | 27 | 38.03 | 56.25  | 0 | 0.00  | 0.00 | 0 | 0.00   | 0.00 | 0 | 0.00 | 0.00 |
| Fabrication standards                                                                 | 7                   | 2                   | 3.33          | 28.57                | 4                    | 5.88                  | 57.14                 | 0                             | 0.00  | 0.00  | 5  | 7.04  | 71.43  | 0 | 0.00  | 0.00 | 0 | 0.00   | 0.00 | 0 | 0.00 | 0.00 |
| no information needed                                                                 | 2                   | 1                   | 1.67          | 50.00                | 1                    | 1.47                  | 50.00                 | 0                             | 0.00  | 0.00  | 2  | 2.82  | 100.00 | 0 | 0.00  | 0.00 | 0 | 0.00   | 0.00 | 0 | 0.00 | 0.00 |
| do not know/decline to answer                                                         | 11                  | 1                   | 1.67          | 9.09                 | 0                    | 0.00                  | 0.00                  | 0                             | 0.00  | 0.00  | 0  | 0.00  | 0.00   | 0 | 0.00  | 0.00 | 0 | 0.00   | 0.00 | 0 | 0.00 | 0.00 |

  

| A2 What are the primary motivations for you to design for digital fabrication over traditional fabrication processes? |                     |                     |               |                      |                      |                       |                       |                               |       |       |    |       |       |    |       |       |   |       |       |   |        |      |   |       |        |
|-----------------------------------------------------------------------------------------------------------------------|---------------------|---------------------|---------------|----------------------|----------------------|-----------------------|-----------------------|-------------------------------|-------|-------|----|-------|-------|----|-------|-------|---|-------|-------|---|--------|------|---|-------|--------|
|                                                                                                                       | 114                 | 60                  | 68            | 7                    | 71                   | 48                    | 7                     | 2                             | 11    |       |    |       |       |    |       |       |   |       |       |   |        |      |   |       |        |
|                                                                                                                       | Machine Constraints | Project implication | Machine codes | Design spec & config | Fabrication sequence | Fabrication standards | no information needed | do not know/decline to answer |       |       |    |       |       |    |       |       |   |       |       |   |        |      |   |       |        |
| Increase geometrical complexity and architectural form                                                                | 54                  | 31                  | 51.67         | 57.41                | 33                   | 48.53                 | 61.11                 | 4                             | 57.14 | 7.41  | 34 | 47.89 | 62.86 | 28 | 58.33 | 51.85 | 2 | 28.57 | 3.70  | 1 | 50.00  | 1.85 | 5 | 45.45 | 9.26   |
| Reduce construction complexity compared to traditional fabrication of the same design                                 | 42                  | 23                  | 38.33         | 54.76                | 26                   | 38.24                 | 61.90                 | 1                             | 14.29 | 2.38  | 28 | 39.44 | 66.67 | 20 | 41.67 | 47.62 | 2 | 28.57 | 4.76  | 2 | 100.00 | 4.76 | 1 | 9.09  | 2.38   |
| Reduce construction cost compared to traditional fabrication of the same design                                       | 43                  | 23                  | 38.33         | 53.49                | 29                   | 42.65                 | 67.44                 | 4                             | 57.14 | 9.30  | 29 | 40.85 | 67.44 | 17 | 35.42 | 39.53 | 3 | 42.86 | 6.98  | 1 | 50.00  | 2.33 | 2 | 18.18 | 4.65   |
| Reduce human dependency and errors                                                                                    | 46                  | 25                  | 41.67         | 54.35                | 26                   | 38.24                 | 56.52                 | 5                             | 71.43 | 10.87 | 30 | 42.25 | 65.22 | 21 | 43.75 | 45.65 | 2 | 28.57 | 4.35  | 1 | 50.00  | 2.17 | 4 | 36.36 | 8.70   |
| Integrate design and production in the supply chain                                                                   | 44                  | 23                  | 38.33         | 52.27                | 26                   | 38.24                 | 59.09                 | 3                             | 42.86 | 6.82  | 32 | 45.07 | 72.73 | 20 | 41.67 | 45.45 | 3 | 42.86 | 6.82  | 1 | 50.00  | 2.27 | 1 | 9.09  | 2.27   |
| Bring advantages of production knowledge earlier into the design process                                              | 37                  | 24                  | 40.00         | 64.86                | 27                   | 39.71                 | 72.97                 | 0                             | 0.00  | 0.00  | 23 | 32.39 | 62.16 | 20 | 41.67 | 54.05 | 4 | 57.14 | 10.80 | 1 | 50.00  | 0.00 | 2 | 18.18 | 5.41   |
| do not know/decline to answer                                                                                         | 2                   | 0                   | 0.00          | 0.00                 | 0                    | 0.00                  | 0.00                  | 0                             | 0.00  | 0.00  | 0  | 0.00  | 0.00  | 0  | 0.00  | 0.00  | 0 | 0.00  | 0.00  | 0 | 0.00   | 0.00 | 2 | 18.18 | 100.00 |

  

| A3 What aspect(s) in design modelling is/are the most essential for successful digital fabrication? |                     |                     |               |                      |                      |                       |                       |                               |       |       |    |       |       |    |       |       |   |       |       |   |        |       |   |       |       |
|-----------------------------------------------------------------------------------------------------|---------------------|---------------------|---------------|----------------------|----------------------|-----------------------|-----------------------|-------------------------------|-------|-------|----|-------|-------|----|-------|-------|---|-------|-------|---|--------|-------|---|-------|-------|
|                                                                                                     | 114                 | 60                  | 68            | 7                    | 71                   | 48                    | 7                     | 2                             | 11    |       |    |       |       |    |       |       |   |       |       |   |        |       |   |       |       |
|                                                                                                     | Machine Constraints | Project implication | Machine codes | Design spec & config | Fabrication sequence | Fabrication standards | no information needed | do not know/decline to answer |       |       |    |       |       |    |       |       |   |       |       |   |        |       |   |       |       |
| Collaboration in a common virtual environment                                                       | 53                  | 23                  | 38.33         | 43.40                | 36                   | 52.94                 | 67.92                 | 4                             | 57.14 | 7.55  | 38 | 53.52 | 71.70 | 26 | 54.17 | 49.06 | 3 | 42.86 | 5.66  | 1 | 50.00  | 1.89  | 3 | 27.27 | 5.66  |
| Modelling follows the fabrication approach/ sequence                                                | 50                  | 29                  | 48.33         | 58.00                | 31                   | 45.59                 | 62.00                 | 3                             | 42.86 | 6.00  | 31 | 43.66 | 62.00 | 28 | 58.33 | 56.00 | 3 | 42.86 | 6.00  | 1 | 50.00  | 2.00  | 2 | 18.18 | 4.00  |
| Tight feedback loops for schedule and cost estimates                                                | 38                  | 19                  | 31.67         | 50.00                | 24                   | 35.29                 | 63.16                 | 2                             | 28.57 | 5.26  | 27 | 38.03 | 71.05 | 18 | 37.50 | 47.37 | 2 | 28.57 | 5.26  | 0 | 0.00   | 0.00  | 2 | 18.18 | 5.26  |
| Coding interface for fabrication machinery                                                          | 9                   | 4                   | 6.67          | 44.44                | 6                    | 8.82                  | 66.67                 | 4                             | 57.14 | 44.44 | 6  | 8.45  | 66.67 | 3  | 6.25  | 33.33 | 0 | 0.00  | 0.00  | 1 | 50.00  | 11.11 | 0 | 0.00  | 0.00  |
| Connections with computer-aided manufacturing/process planning (CAM/CAPP) system                    | 34                  | 20                  | 33.33         | 58.82                | 18                   | 26.47                 | 52.94                 | 5                             | 71.43 | 14.71 | 27 | 38.03 | 79.41 | 12 | 25.00 | 35.29 | 5 | 71.43 | 14.71 | 1 | 50.00  | 2.94  | 0 | 0.00  | 0.00  |
| Parametric modelling capacity                                                                       | 50                  | 26                  | 43.33         | 52.00                | 34                   | 50.00                 | 68.00                 | 0                             | 0.00  | 0.00  | 30 | 42.25 | 60.00 | 22 | 45.83 | 44.00 | 3 | 42.86 | 6.00  | 2 | 100.00 | 4.00  | 4 | 36.36 | 8.00  |
| do not know/decline to answer                                                                       | 8                   | 4                   | 6.67          | 50.00                | 3                    | 4.41                  | 37.50                 | 0                             | 0.00  | 0.00  | 2  | 2.82  | 25.00 | 2  | 4.17  | 25.00 | 1 | 14.29 | 12.50 | 0 | 0.00   | 0.00  | 4 | 36.36 | 50.00 |

  

| A4 What aspect(s) in design review is/are the most essential for successful digital fabrication? |                     |                     |               |                      |                      |                       |                       |                               |        |       |    |       |       |    |       |       |   |       |       |   |        |      |   |       |       |
|--------------------------------------------------------------------------------------------------|---------------------|---------------------|---------------|----------------------|----------------------|-----------------------|-----------------------|-------------------------------|--------|-------|----|-------|-------|----|-------|-------|---|-------|-------|---|--------|------|---|-------|-------|
|                                                                                                  | 114                 | 60                  | 68            | 7                    | 71                   | 48                    | 7                     | 2                             | 11     |       |    |       |       |    |       |       |   |       |       |   |        |      |   |       |       |
|                                                                                                  | Machine Constraints | Project implication | Machine codes | Design spec & config | Fabrication sequence | Fabrication standards | no information needed | do not know/decline to answer |        |       |    |       |       |    |       |       |   |       |       |   |        |      |   |       |       |
| Collaboration in a common virtual environment                                                    | 62                  | 30                  | 50.00         | 48.39                | 41                   | 60.29                 | 66.13                 | 3                             | 42.86  | 4.84  | 40 | 56.34 | 64.52 | 30 | 62.50 | 48.39 | 4 | 57.14 | 6.45  | 0 | 0.00   | 0.00 | 5 | 45.45 | 8.06  |
| Coding interface for fabrication machinery                                                       | 18                  | 9                   | 15.00         | 50.00                | 11                   | 16.18                 | 61.11                 | 4                             | 57.14  | 22.22 | 11 | 15.49 | 61.11 | 6  | 12.50 | 33.33 | 0 | 0.00  | 0.00  | 0 | 0.00   | 0.00 | 1 | 9.09  | 5.56  |
| Process visualisation and simulation                                                             | 74                  | 43                  | 71.67         | 58.11                | 49                   | 72.06                 | 66.22                 | 7                             | 100.00 | 9.46  | 55 | 77.46 | 74.32 | 32 | 66.67 | 43.24 | 5 | 71.43 | 6.76  | 2 | 100.00 | 2.70 | 2 | 18.18 | 2.70  |
| Factory setup/virtual commissioning visualisation                                                | 17                  | 11                  | 18.33         | 64.71                | 9                    | 13.24                 | 52.94                 | 1                             | 14.29  | 5.88  | 11 | 15.49 | 64.71 | 12 | 25.00 | 70.59 | 0 | 0.00  | 0.00  | 1 | 50.00  | 5.88 | 0 | 0.00  | 0.00  |
| Virtual reality/ augmented reality supportive interface                                          | 16                  | 9                   | 15.00         | 56.25                | 9                    | 13.24                 | 56.25                 | 0                             | 0.00   | 0.00  | 12 | 16.90 | 75.00 | 5  | 10.42 | 31.25 | 2 | 28.57 | 12.50 | 0 | 0.00   | 0.00 | 3 | 27.27 | 18.75 |
| Demonstration of the fabrication intents                                                         | 39                  | 22                  | 36.67         | 56.41                | 22                   | 32.35                 | 56.41                 | 2                             | 28.57  | 5.13  | 29 | 40.85 | 74.36 | 21 | 43.75 | 53.85 | 3 | 42.86 | 7.69  | 2 | 100.00 | 5.13 | 1 | 9.09  | 2.56  |
| do not know/decline to answer                                                                    | 7                   | 3                   | 5.00          | 42.86                | 2                    | 2.94                  | 28.57                 | 0                             | 0.00   | 0.00  | 1  | 1.41  | 14.29 | 0  | 0.00  | 0.00  | 1 | 14.29 | 14.29 | 0 | 0.00   | 0.00 | 4 | 36.36 | 57.14 |

  

| A5 What content(s) in design documentation is/are the most essential for successful digital fabrication? |                     |                     |               |                      |                      |                       |                       |                               |       |       |    |       |       |    |       |       |   |       |       |   |        |      |   |       |       |
|----------------------------------------------------------------------------------------------------------|---------------------|---------------------|---------------|----------------------|----------------------|-----------------------|-----------------------|-------------------------------|-------|-------|----|-------|-------|----|-------|-------|---|-------|-------|---|--------|------|---|-------|-------|
|                                                                                                          | 114                 | 60                  | 68            | 7                    | 71                   | 48                    | 7                     | 2                             | 11    |       |    |       |       |    |       |       |   |       |       |   |        |      |   |       |       |
|                                                                                                          | Machine Constraints | Project implication | Machine codes | Design spec & config | Fabrication sequence | Fabrication standards | no information needed | do not know/decline to answer |       |       |    |       |       |    |       |       |   |       |       |   |        |      |   |       |       |
| Model ontology and configuration to match the fabrication approach                                       | 56                  | 33                  | 55.00         | 58.93                | 35                   | 51.47                 | 62.50                 | 5                             | 71.43 | 8.93  | 41 | 57.75 | 73.21 | 26 | 54.17 | 46.43 | 4 | 57.14 | 7.14  | 1 | 50.00  | 1.79 | 1 | 9.09  | 1.79  |
| Fabrication codes and specification                                                                      | 39                  | 28                  | 46.67         | 71.79                | 22                   | 32.35                 | 56.41                 | 5                             | 71.43 | 12.82 | 28 | 39.44 | 71.79 | 16 | 33.33 | 41.03 | 3 | 42.86 | 7.69  | 2 | 100.00 | 5.13 | 1 | 9.09  | 2.56  |
| Reliability matrix and fabrication health & safety-related matrix                                        | 6                   | 3                   | 5.00          | 50.00                | 4                    | 5.88                  | 66.67                 | 1                             | 14.29 | 16.67 | 3  | 4.23  | 50.00 | 3  | 6.25  | 50.00 | 0 | 0.00  | 0.00  | 0 | 0.00   | 0.00 | 1 | 9.09  | 16.67 |
| Exact quantity takeoff for a specified fabrication approach                                              | 38                  | 19                  | 31.67         | 50.00                | 22                   | 32.35                 | 57.89                 | 3                             | 42.86 | 7.89  | 28 | 39.44 | 73.68 | 20 | 41.67 | 52.63 | 3 | 42.86 | 7.89  | 1 | 50.00  | 2.63 | 1 | 9.09  | 2.63  |
| Supply-chain information and matrix                                                                      | 29                  | 12                  | 20.00         | 41.38                | 17                   | 25.00                 | 58.82                 | 0                             | 0.00  | 0.00  | 21 | 29.58 | 72.41 | 17 | 35.42 | 58.62 | 1 | 14.29 | 3.45  | 1 | 50.00  | 3.45 | 0 | 0.00  | 0.00  |
| Information about the process simulation and commissioning                                               | 26                  | 14                  | 23.33         | 53.85                | 20                   | 29.41                 | 76.92                 | 2                             | 28.57 | 7.69  | 20 | 28.17 | 76.92 | 11 | 22.92 | 42.31 | 3 | 42.86 | 11.54 | 1 | 50.00  | 3.85 | 0 | 0.00  | 0.00  |
| do not know/decline to answer                                                                            | 20                  | 9                   | 15.00         | 45.00                | 10                   | 14.71                 | 50.00                 | 0                             | 0.00  | 0.00  | 6  | 8.45  | 30.00 | 6  | 12.50 | 30.00 | 1 | 14.29 | 5.00  | 0 | 0.00   | 0.00 | 7 | 63.64 | 35.00 |

  

| A6 To what extent should a digital twin in fabrication be prepared for digital fabrication? |                     |                     |               |                      |                      |                       |                       |                               |       |       |    |       |       |    |       |       |   |       |       |   |       |      |   |       |       |
|---------------------------------------------------------------------------------------------|---------------------|---------------------|---------------|----------------------|----------------------|-----------------------|-----------------------|-------------------------------|-------|-------|----|-------|-------|----|-------|-------|---|-------|-------|---|-------|------|---|-------|-------|
|                                                                                             | 114                 | 60                  | 68            | 7                    | 71                   | 48                    | 7                     | 2                             | 11    |       |    |       |       |    |       |       |   |       |       |   |       |      |   |       |       |
|                                                                                             | Machine Constraints | Project implication | Machine codes | Design spec & config | Fabrication sequence | Fabrication standards | no information needed | do not know/decline to answer |       |       |    |       |       |    |       |       |   |       |       |   |       |      |   |       |       |
| A digital twin strategy should be included for project tendering                            | 42                  | 21                  | 35.00         | 50.00                | 29                   | 42.65                 | 69.05                 | 2                             | 28.57 | 4.76  | 27 | 38.03 | 64.29 | 18 | 37.50 | 42.86 | 1 | 14.29 | 2.38  | 0 | 0.00  | 0.00 | 4 | 36.36 | 9.52  |
| A digital twin ready design model should be included in the project contract                | 27                  | 12                  | 20.00         | 44.44                | 15                   | 22.06                 | 55.56                 | 2                             | 28.57 | 7.41  | 18 | 25.35 | 66.67 | 10 | 20.83 | 37.04 | 3 | 42.86 | 11.11 | 1 | 50.00 | 3.70 | 2 | 18.18 | 7.41  |
| A physical mockup can test the digital twin technology before tendering                     | 19                  | 11                  | 18.33         | 57.89                | 12                   | 17.65                 | 63.16                 | 1                             | 14.29 | 5.26  | 15 | 21.13 | 78.95 | 10 | 20.83 | 52.63 | 1 | 14.29 | 5.26  | 1 | 50.00 | 5.26 | 0 | 0.00  | 0.00  |
| No digital twin is necessary but virtual commissioning is needed                            | 8                   | 6                   | 10.00         | 75.00                | 3                    | 4.41                  | 37.50                 | 2                             | 28.57 | 25.00 | 4  | 5.63  | 50.00 | 5  | 10.42 | 62.50 | 0 | 0.00  | 0.00  | 0 | 0.00  | 0.00 | 0 | 0.00  | 0.00  |
| Neither digital twin nor virtual commissioning is necessary                                 | 3                   | 1                   | 1.67          | 33.33                | 1                    | 1.47                  | 33.33                 | 0                             | 0.00  | 0.00  | 0  | 0.00  | 0.00  | 2  | 4.17  | 66.67 | 0 | 0.00  | 0.00  | 0 | 0.00  | 0.00 | 0 | 0.00  | 0.00  |
| do not know/decline to answer                                                               | 11                  | 6                   | 10.00         | 54.55                | 6                    | 8.82                  | 54.55                 | 0                             | 0.00  | 0.00  | 4  | 5.63  | 36.36 | 1  | 2.08  | 9.09  | 1 | 14.29 | 9.09  | 0 | 0.00  | 0.00 | 5 | 45.45 | 45.45 |

Fig. S1. The questionnaire survey distributed in May 2020 and the results.

an ONLINE SURVEY オンライン調査

Industry needs analysis on collaboration and integration platforms to manage the design process of digital fabrication  
デジタルファブリケーションの設計プロセスを管理するためのコラボレーション(共に働く)と統合プラットフォームに関する業界の需要分析

参加者の皆様へ

The purpose of this survey is to better understand the requirements of a model-based platform and platform-based integration to manage and implement digital fabrication during the design stage in construction projects. This survey takes a socio-technical perspective and includes questions regarding technical, technological, organizational, and contractual themes. The results of this survey will inform future research on potentials for a collaboration platform that allows for interdisciplinary co-creation of digital fabrication.

The information you provide will be kept completely confidential under the General Data Protection Regulations and merely used for research purposes. No personal or organisational information will be revealed in any research outputs or shared with any third party.

The survey is calibrated to take 10-15 minutes to complete.

At the conclusion of the survey, you may indicate if you wish to receive a summary of the preliminary findings from this survey.

Thank you very much for your participation.

本調査の目的は、建設プロジェクトの設計段階でデジタルファブリケーションを管理と実施するためのモデルに基づくプラットフォームとプラットフォームに基づく統合管理の要件をよりよく理解することです。この調査では、社会技術(socio-technical)的な観点から、技術的、テクノロジー的、組織的、契約的、ビジネスモデル的なテーマに関する質問が含まれています。この調査結果は、デジタルファブリケーションの学際的な共創(co-create)を可能にするコラボレーションプラットフォームとプラットフォームに基づく統合管理の可能性についての今後の研究に役立つでしょう。ご記入いただいた情報は、一般データ保護規則に基づき、完全に機密扱いとし、研究目的のためにのみ使用します。個人情報や組織情報が研究成果として明らかにされたり、第三者と共有されたりすることはありません。

調査は10~15分で完了するように校正されています。

調査の最後に、本調査の予備的な所見の要約を希望する場合は、その旨を表示することができます。

日本語が母国語ではないので、言葉に間違いがあったら事前に謝罪します。

よろしくお願いたします。

CHAIR OF INNOVATIVE AND INDUSTRIAL CONSTRUCTION, ETH ZÜRICH スイス連邦工科大学チューリッヒ校

Charmaine M.S. Ng 吳明珊, SIA/ETH RIBA ARB LEED AP BD+C M.ASCE  
ng@ibi.baug.ethz.ch

QUESTION TYPES OVERVIEW 問タイプの概要

| Background Information 背景情報 | Operational Requirements 運用要件 |                         | Management Requirements 管理要件 |                   |                           | total |
|-----------------------------|-------------------------------|-------------------------|------------------------------|-------------------|---------------------------|-------|
|                             | A. Technical 技術               | B. Technological テクノロジー | C. Organisational 組織         | D. Contractual 契約 | E. Business Model ビジネスモデル |       |
| no. of questions            | 3                             | 6                       | 4                            | 2                 | 3                         | 21    |

DESIGN STAGES TERMINOLOGY 設計段階の用語

| country                     | Switzerland                | United Kingdom                  | Italy                                     | U.S.A.                      | Japan                   | Singapore         |
|-----------------------------|----------------------------|---------------------------------|-------------------------------------------|-----------------------------|-------------------------|-------------------|
| <b>Terms in this survey</b> | <b>SIA Leistungsmodell</b> | <b>RIBA Plan of work 2020</b>   | <b>ITA Procurement</b>                    | <b>AIA Phases of Design</b> | <b>TAAF 設計から完成までの流れ</b> | <b>BCA Stages</b> |
| Strategic Definition        | 1. Strategische Planung    | 0. Strategic Definition         | progetto di fattibilità tecnico-economica | Project Brief               | 企画 (kikaku)             | Project Brief     |
| Feasibility Study           | 2. Vorstudien              | 1. Preparation & Brief          |                                           | Pre-design/ Concept         | 基本設計 (kijohsekkai)      | Concept Design    |
| Schematic Design            | 3.1 Vorprojekt             | 2. Concept Design               | progetto preliminare                      | Schematic Design            |                         |                   |
| Detailed Design             | 3.2 Bauprojekt             | 3. Spatial Coordination         | progetto definitivo                       | Design Development          | 実施設計 (jishisekkai)      | Detailed Design   |
| Technical Design            | 4. Ausschreibung           | 4. Technical Design             | progetto esecutivo                        |                             |                         |                   |
| Documentation               | 5. Ausführung              | 5. Manufacturing & Construction | costruzione                               | Construction                | 工事管理 (koujikanri)       | Construction      |
| Handover                    | 5.3 Inbetriebnahme         | 6. Handover                     | collaudo e consegna                       | Commission                  | 完了検査 (kanryokensa)      | Post-Completion   |
| Operation                   | 6. Bewirtschaftung         | 7. Use                          | uso e manutenzione                        | Occupancy                   | 建物使用 (tatemonshyō)      |                   |

DEFINITIONS 用語

**DIGITAL FABRICATION** refers to data-driven production, which combines design and construction into an integrated process through programming language tasks to control machines to complete manufacturing tasks.

It includes tools such as Computer Numerical Control (CNC), robotics and 3D printers.

**DIGITAL FABRICATION** デジタルファブリケーションは、データ駆動型の生産のことで、設計と製造をプログラミング言語のタスクを介して統合されたプロセスに統合し、製造タスクを完了するために機械を制御することを意味します。それは、CNC、ロボティクス、3Dプリンタなどのツールが含まれます。

**BUILDING INFORMATION MODELLING (BIM)** is a cross-disciplinary set of policies, processes and technologies.

It generates a "methodology to manage the essential building design and project data in digital format throughout the building life-cycle".

It includes not only software that allows the geometrical modelling and the input of information but also project management related tools and processes.

**BUILDING INFORMATION MODELLING (BIM) ビルディング・インフォメーション・モデリング**は、建築、プロセス、技術の学際的セットです。BIMは、建物のライフサイクルにおいてそのデータを構築管理するための工程である。幾何学的なモデリングや情報の入力可能なソフトウェアだけでなく、プロジェクト管理に関連するツールやプロセスも含まれています。

**PLATFORM** refers to a collaborative platform which allows stakeholders to co-create for design modelling, design review, project management, progress monitoring and optimisation of cost and constructability.

The shared information on such a platform should remain consistent among all stakeholders at all time.

The platform in this survey can refer to an existing one available in the market, such as Autodesk Revit/BIM360, Graphisoft ArchiCAD/ BIMcloud; or a modified version of an existing one; or a completely new one to be developed.

**PLATFORMプラットフォーム**とは、設計モデリング、設計レビュー、プロジェクト管理、進捗状況のモニタリング、コストと施工性の最適化のためにプロジェクトチームが共同で作成することを可能にする共同プラットフォームのことを指します。

このようなプラットフォーム上で共有される設計情報は、すべてのプロジェクトチームの間で常に一貫性が保たれていなければならない。

本調査におけるプラットフォームとは、Autodesk Revit/BIM360、Graphisoft ArchiCAD/BIMcloudなど、市場に出回っている既存のもの、または既存のものの改良版、または開発中の全く新しいものを指します。

**BIM-BASED PLATFORM** provides measurable data for progress tracking, risk management, trust-building and benchmark of deliverables for quality control and trade tendering, and supports integrated design management.

**BIM-BASED PLATFORM BIMプラットフォーム**は、進捗状況の追跡、リスク管理、信頼構築、品質管理と入札のための成果物のベンチマークのための測定可能なデータを提供し、統合された設計管理をサポートします。

**PLATFORM-BASED INTEGRATION** refers to a management model which integrates processes and stakeholders in project collaboration through collaborative platforms.

**PLATFORM-BASED INTEGRATION プラットフォームに基づく統合管理**は、コラボレーションプラットフォームを介して、プロジェクトのコラボレーションにおけるプロセスとプロジェクトチームを統合する管理モデルのことを指します。

**Industry needs analysis on collaboration and integration platforms to manage the design process of digital fabrication**  
**デジタルファブリケーションの設計プロセスを管理するためのコラボレーション(共に働く)と統合プラットフォームに関する業界の需要分析**

**BACKGROUND INFORMATION**

i Please select the role(s) that best describe your experience and background? (please pick min:1, max:all boxes)  
 あなたの職業は何ですか? (最小:1つ、最大:3つのオプションを選択してください)

- Researcher/ academia professional 研究者
- Project owner/ developer/ investor/ building business manager 不動産開発業者
- Project manager プロジェクトマネージャー
- Architect/ architectural designer 建築士
- BIM manager, interface manager, BIM coordinator BIMマネージャー/BIMコーディネーター
- Design engineer (e.g. structural engineer, MEP engineer) 建設エンジニア (構造エンジニア, MEPエンジニア)
- General contractor 工事ゼネコン
- Digital fabrication contractor デジタルファブリケーション工事契約者
- Platform developer (e.g. software engineer) ソフトウェアエンジニア
- Platform manager/ investor プラットフォーム開発業者/プラットフォームマネージャー
- Contract manager/ lawyer/policy-maker 契約マネージャー/弁護士/せいさくか
- Consultant コンサルタント
- do not know/decline to answer わからない/答えたくない
- Other: (please specify) その他 (ご指定ください)

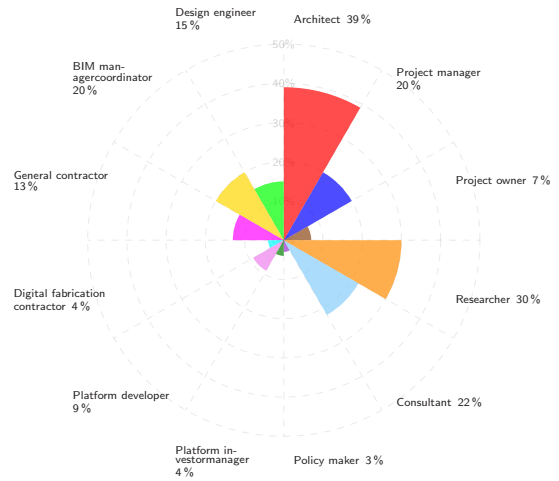

ii Please indicate your experience in the following field(s)?

以下の分野での経験は何年ですか? (少なくとも1つの選択肢を選択してください)

|                                                 | Digital Fabrication デジタルファブリケーション |                          | BIM                      | Software Development<br>ソフトウェア開発 |
|-------------------------------------------------|-----------------------------------|--------------------------|--------------------------|----------------------------------|
|                                                 | Design 設計プロセス                     | Construction 工事プロセス      |                          |                                  |
| No experience 経験なし                              | <input type="checkbox"/>          | <input type="checkbox"/> | <input type="checkbox"/> | <input type="checkbox"/>         |
| Less than 1 year of experience 経験1年未満           | <input type="checkbox"/>          | <input type="checkbox"/> | <input type="checkbox"/> | <input type="checkbox"/>         |
| Between 1 and 5 years of experience 1年以上5年未満の経験 | <input type="checkbox"/>          | <input type="checkbox"/> | <input type="checkbox"/> | <input type="checkbox"/>         |
| More than 5 years of experience 5年以上の経験をお持ちの方   | <input type="checkbox"/>          | <input type="checkbox"/> | <input type="checkbox"/> | <input type="checkbox"/>         |
| do not know/decline to answer わからない/答えたくない      | <input type="checkbox"/>          | <input type="checkbox"/> | <input type="checkbox"/> | <input type="checkbox"/>         |

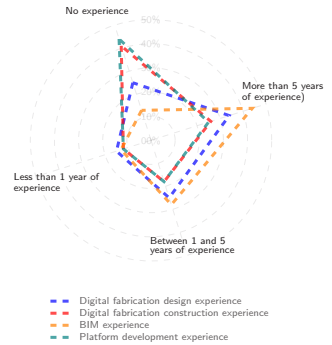

iii Please indicate the market(s) in which you have experience? (please pick min:1, max:all boxes)

経験のある市場をご記入ください。(少なくとも1つの選択肢を選択してください)

- Africa アフリカ
  - Asia アジア
  - Australasia オーストラリア
  - Europe ヨーロッパ
  - Middle East 中東
  - North America 北アメリカ
  - South America 南アメリカ
  - do not know/decline to answer わからない/答えたくない
- Optional to specify 任意指定ください: \_\_\_\_\_

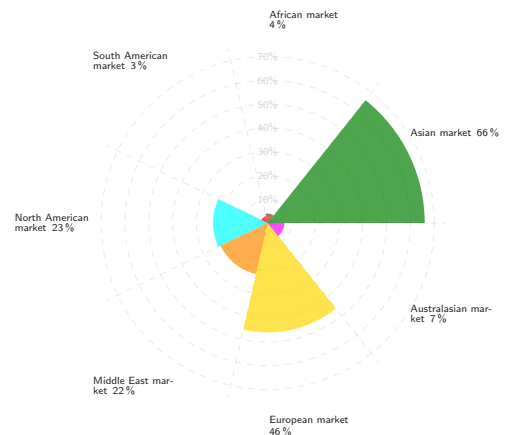

Industry needs analysis on collaboration and integration platforms to manage the design process of digital fabrication  
デジタルファブリケーションの設計プロセスを管理するためのコラボレーション(共に働く)と統合プラットフォームに関する業界の需要分析

PLATFORM OPERATIONAL REQUIREMENTS プラットフォームの運用要件

A TECHNICAL - DIGITAL FABRICATION SPECIFIC 技術 - デジタルファブリケーション

In this section, we would like to understand what digital fabrication-related information is needed in the design process in a construction project.  
ここでは、建設プロジェクトにおける設計プロセスにおいて、どのようなデジタルファブリケーション関連情報が必要なのかを把握したい。

A1 Which fabrication-related information is the most essential to the design process? (please tick min:1, max:3 boxes)  
設計プロセスで最も必要とされる製造関連情報はどれか? (最小:1つ、最大:3つのオプションを選択してください)

- Machine constraints (e.g. min/max cutting length) 機械制約 (例: 最小/最大切削長さなど)
- Project implication (e.g. performance, cost, duration) プロジェクトの意味合い (例: パフォーマンス、コスト)
- Machine codes (e.g. G-codes, path-planning) 機械コード (例: Gコード、パスプランニング)
- Design specification and configuration 設計仕様と構成
- Fabrication sequence and approach 製造順序とアプローチ
- Fabrication standards (e.g. ISO-9000 quality management) 製造規格 (例: ISO-9000品質管理)
- No fabrication-related information is needed in the design process 設計工程では、製造関連の情報はありません
- do not know/decline to answer わからない/答えたくない
- Other: (please specify) その他 (ご指定ください)

A1.1 At which project stage is fabrication-related information first needed? (please choose from the dropdown menu)  
製造関連情報はどのプロジェクト段階から必要になるのか? (ドロップダウンメニューからお選びください)

- ▲ Strategic Definition, Feasibility Study, Schematic Design, Detailed Design, Technical Design, Documentation, Construction, Handover, Operation, Not Applicable

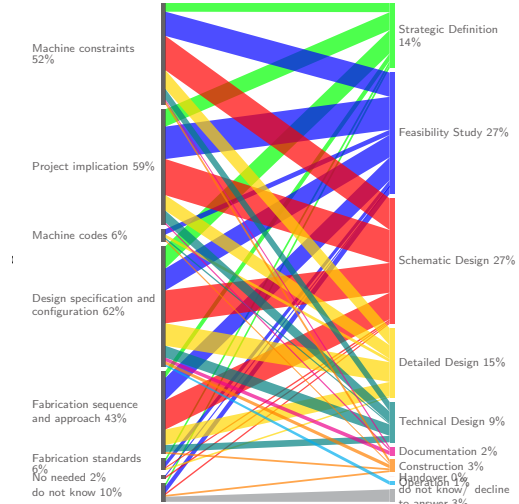

A2 What are the primary motivations for you to design for digital fabrication over traditional fabrication processes? (please tick min:1, max:3 boxes)  
従来のファブリケーションプロセスよりも、デジタルファブリケーションのための設計をしようと思った主な動機は何ですか? (最小:1つ、最大:3つのオプションを選択してください)

- Increase geometrical complexity and architectural form 幾何学的な複雑さと建築様式を増加させることができます
- Reduce construction complexity compared to traditional fabrication of the same design 同一設計の従来の製造と比較して、建設の複雑さを軽減します
- Reduce construction cost compared to traditional fabrication of the same design 同一設計の従来の製造に比べて建設コストを削減します
- Reduce human dependency and errors 人への依存度やエラーを減らすことができます
- Integrate design and production in the supply chain サプライチェーンの中でデザインと生産を統合しています
- Bring advantages of production knowledge earlier into the design process 生産知識の利点を設計プロセスに早期にもたす
- do not know/decline to answer わからない/答えたくない
- Other: (please specify) その他 (ご指定ください)

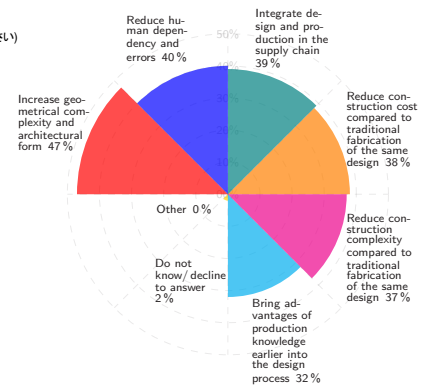

A3 What aspect(s) in design modelling is/are the most essential for successful digital fabrication? (please tick min:1, max:3 boxes)  
デジタルファブリケーションを成功させるために、設計モデリングのどのような側面が最も重要ですか? (最小:1つ、最大:3つのオプションを選択してください)

- Collaboration in a common virtual environment (e.g. a shared modelling interface) 共通の仮想環境でのコラボレーション (例: 共有モデリングインターフェース)
- Modelling follows the fabrication approach/ sequence モデリングはファブリケーションのアプローチ/シーケンスに従います。
- Tight feedback loops for schedule and cost estimates スケジュールとコストの見積もりのためのタイトなフィードバックループ
- Coding interface for fabrication machinery (if known) 機械のコーディングインターフェース (既知の場合)
- Connections with computer-aided manufacturing/process planning (CAM/CAPP) system (if known) コンピュータ支援製造/工程計画システムとの接続 (既知の場合)
- Parametric modelling capacity パラメトリックモデリング能力
- do not know/decline to answer わからない/答えたくない
- Other: (please specify) その他 (ご指定ください)

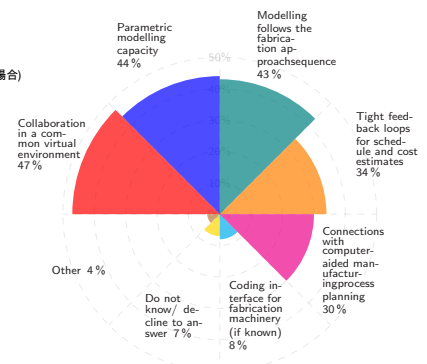

an ONLINE SURVEY オンライン調査

Industry needs analysis on collaboration and integration platforms to manage the design process of digital fabrication  
デジタルファブリケーションの設計プロセスを管理するためのコラボレーション(共に働く)と統合プラットフォームに関する業界の需要分析

PLATFORM OPERATIONAL REQUIREMENTS プラットフォームの運用要件

A TECHNICAL - DIGITAL FABRICATION SPECIFIC 技術 - デジタルファブリケーション

In this section, we would like to understand what digital fabrication-related information is needed in the design process in a construction project.  
ここでは、建設プロジェクトにおける設計プロセスにおいて、どのようなデジタルファブリケーション関連情報が必要なのかを把握したい。

A4 What aspect(s) in design review is/are the most essential for successful digital fabrication? (please tick min:1, max:3 boxes)

- デジタルファブリケーションを成功させるために、設計レビューのどのような側面が最も重要ですか? (最小:1つ、最大:3つのオプションを選択してください)
- Collaboration in a common virtual environment (e.g. a shared modelling interface) 共通の仮想環境でのコラボレーション(例:共有モデリングインターフェース)
  - Coding interface for fabrication machinery (if known) 機械のコーディングインターフェース(既知の場合)
  - Process visualisation and simulation プロセスの可視化とシミュレーション
  - Factory setup/virtual commissioning visualisation (if new machinery is required) 工場のセットアップ/バーチャル試運転の可視化(新しい機械が必要な場合)
  - Virtual reality/ augmented reality supportive interface VR仮想現実/AR拡張現実支援インターフェース
  - Demonstration of the fabrication intents (e.g. digital twinning the fabrication machines) 製造意図のデモンストレーション(例: 製造のデジタルツwinning)
  - do not know/decline to answer わからない/答えたくない
  - Other: (please specify) その他(ご指定ください)

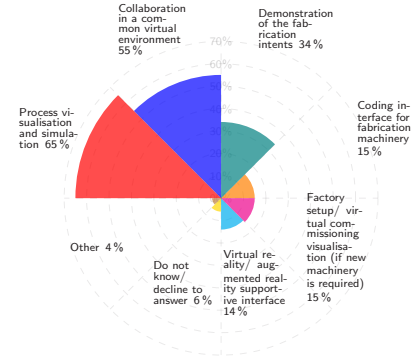

A5 What content(s) in design documentation is/are the most essential for successful digital fabrication? (please tick min:1, max:3 boxes)

デジタルファブリケーションを成功させるために、設計ドキュメンテーションのどのような内容が最も重要ですか? (最小:1つ、最大:3つのオプションを選択してください)

- Model ontology and configuration to match the fabrication approach 製造アプローチに合わせたモデルオントロジーと構成
- Fabrication codes and specification 機械のコードと仕様
- Reliability matrix and fabrication health & safety-related matrix 信頼性行列と建設工事の現場健康安全関連行列
- Exact quantity takeoff for a specified fabrication approach 製造アプローチに合わせた数量計算
- Supply-chain information and matrix サプライチェーン情報と行列
- Information about the process simulation and commissioning プロセスシミュレーションと試運転に関する情報
- do not know/decline to answer わからない/答えたくない
- Other: (please specify) その他(ご指定ください)

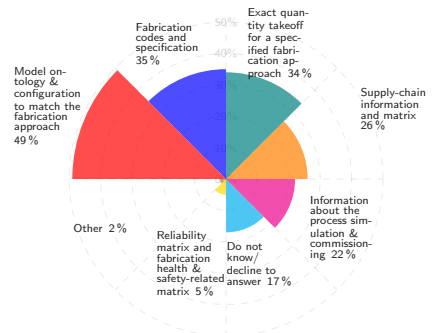

Digital Twin refers to a virtual model or replica of assets, processes, systems, and other entities

Data in a digital twin include BIM and 3D models, 2D information, schedules, contracts, construction documents and operational data collected by the embedded sensors.

デジタルツwinとは、資産、プロセス、システム、その他のエンティティの仮想モデルまたはレプリカを指します。

BIMや3Dモデル、2D情報、スケジュール、契約書、建設文書、組み込みセンサーで収集した運用データなどです。

A6 To what extent should a digital twin in fabrication be prepared for digital fabrication? (please tick min:1, max:1 box)

- 製造中のデジタルツwin、どの程度まで準備しておくべきでしょうか? (1つの選択肢を選択してください)
- A digital twin strategy should be included for project tendering プロジェクトの入札には、デジタルツwin戦略を含めるべきです
  - A digital twin ready design model should be included in the project contract デジタルツwiningをプロジェクト契約書に含める必要があります
  - A physical mockup can test the digital twin technology before tendering プロトタイプ工事の入札前にデジタルツwin技術进行测试することができます
  - No digital twin is necessary but virtual commissioning is needed in case of a new machinery setup デジタルツwinは必要ありませんが、バーチャル試運転が必要で
  - Neither digital twin nor virtual commissioning is necessary デジタルツwinもバーチャル試運転も不要
  - do not know/decline to answer わからない/答えたくない
  - Other: (please specify) その他(ご指定ください)

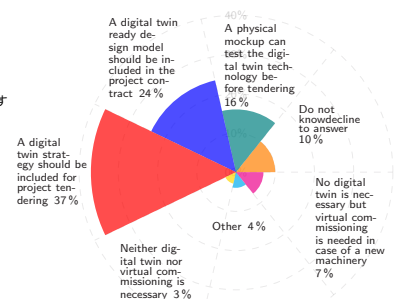

**Industry needs analysis on collaboration and integration platforms to manage the design process of digital fabrication**  
**デジタルファブリケーションの設計プロセスを管理するためのコラボレーション(共に働く)と統合プラットフォームに関する業界の需要分析**

**PLATFORM OPERATIONAL REQUIREMENTS プラットフォームの運用要件**

**B TECHNOLOGICAL - PLATFORM SPECIFIC テクノロジー - プラットフォーム**

In this section, we would like to understand how a platform can support a BIM-based design process of digital fabrication in a construction project.

ここでは、提案されている共同プラットフォームが、建設プロジェクトにおけるデジタルファブリケーションのBIMベースの設計プロセスをどのようにサポートすることができるかを理解したいと思います。

**B1 What software/program language(s) do you usually use for digital fabrication programming? (please tick min:1, max:3 boxes)**

デジタルファブリケーションのプログラミングには、普段どのようなソフトウェアプログラム言語を使用していますか? (最小:1つ、最大:3つのオプションを選択してください)

- Rhino plugins (e.g. Grasshopper, RoboDK, KUKA|prc)
- Dynamo plugins (e.g. Machina, Zero Touch)
- RobotStudio
- MATLAB
- Python
- C++
- C#
- Java
- JavaScript
- No experience in digital fabrication programming デジタルファブリケーションのプログラミング経験がない方
- do not know/decline to answer わからない/答えたくない
- Other: (please specify) その他(ご指定ください)

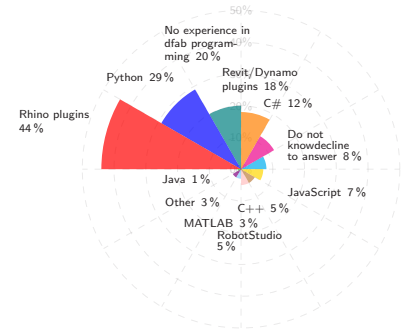

**B2 How should the machine code (e.g. G-code) be supported for editing on the platform? (please tick min:1, max:3 boxes)**

機械のコード(例:Gコードなど)は、プラットフォーム上で編集するためにどのようにサポートされるべきですか? (最小:1つ、最大:3つのオプションを選択してください)

- As original code editable in an internal source code interface 内部ソースコードインターフェースで編集可能なオリジナルコードとして
- As original code for view and comment only 表示とコメントのみのオリジナルコードとして
- Adopted in an integrated visual programming language (e.g. Dynamo) 統合されたビジュアルプログラミング言語(例: Dynamo)で採用されています
- Adopted as a dataset in the specification 仕様ではデータセットとして採用されている
- Linked to external source code platform (e.g. Github) 外部のソースコードプラットフォーム(例: Github)へのリンク
- No support is necessary サポートは必要ありません
- do not know/decline to answer わからない/答えたくない
- Other: (please specify) その他(ご指定ください)

**B2.1 At which stage is the machine code first needed? (please choose from the dropdown menu)**

ファブリケーションのコードが最初に必要になるのはどの設計段階からですか? (ドロップダウンメニューからお選びください)

- ▲ Strategic Definition, Feasibility Study, Schematic Design, Detailed Design, Technical Design, Documentation, Construction, Handover, Operation, Not Applicable

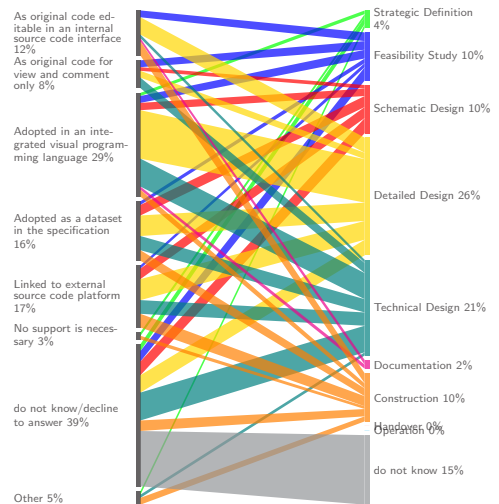

an ONLINE SURVEY オンライン調査

Industry needs analysis on collaboration and integration platforms to manage the design process of digital fabrication  
デジタルファブリケーションの設計プロセスを管理するためのコラボレーション(共に働く)と統合プラットフォームに関する業界の需要分析

PLATFORM OPERATIONAL REQUIREMENTS プラットフォームの運用要件

B TECHNOLOGICAL - PLATFORM SPECIFIC テクノロジー - プラットフォーム

In this section, we would like to understand how a platform can support a BIM-based design process of digital fabrication in a construction project.  
ここでは、提案されている共同プラットフォームが、建設プロジェクトにおけるデジタルファブリケーションのBIMベースの設計プロセスをどのようにサポートすることができるかを理解したいと思います。

B3 Which digital fabrication information, if shared on an online cloud platform, would most benefit the design process? (please tick min:1, max:3 boxes)  
オンラインのクラウドプラットフォーム上で共有されている場合、どの設計プロセスに最も有益なんでしょうか? (最小:1つ、最大:3つのオプションを選択してください)

- 3D modelling interface 3Dモデリングインターフェース
- Model ontology and configuration モデルオントロジーと構成
- Fabrication machine code (e.g. G-code, path-planning) ファブリケーションマシンコード (例: Gコード、パスプランニング)
- Scheduling & process simulation/ animation スケジューリング、工程シミュレーション/アニメーション
- Documentation (e.g. drawings, specification, request for information (RFI) matrix) 文書 (図面、仕様書、資料請求書 (RFI) 行列)
- Immersive design review (e.g. VR virtual meeting) 没入型デザインレビュー (例: VR/バーチャル会議など)
- no online information is needed オンライン情報は不要
- do not know/decline to answer わからない/答えたくない
- Other: (please specify) その他 (ご指定ください)

B3.1 At which project stage would the above cloud-based sharing of model information be most helpful? (please choose from the dropdown menu)

モデル情報のクラウドでの共有は、どの設計段階から最も役立つでしょうか? (ドロップダウンメニューからお選びください)

- ▲ Strategic Definition, Feasibility Study, Schematic Design, Detailed Design, Technical Design, Documentation, Construction, Handover, Operation, Not Applicable

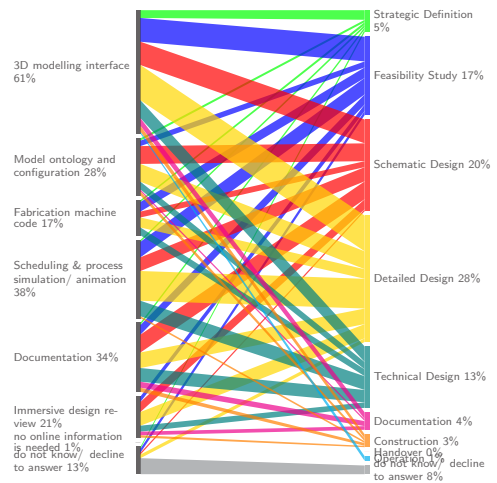

B4 If a collaboration platform was created, what supporting function(s) for communication and knowledge sharing would be most useful to you? (please tick min:1, max:3 boxes)

プラットフォームの場合、コミュニケーションや知識共有のためにどのような支援機能が最も役立つと思いますか? (最小:1つ、最大:3つのオプションを選択してください)

- Instant messaging/ mailing tool (e.g. Skype for business, Yammer) インスタントメッセージング/メールツール
- Drawing-related communication tool (e.g. Bluebeam) 図面関連のコミュニケーションツール
- Graphic project management tool (e.g. Trello) グラフィックプロジェクト管理ツール
- Large-size file sharing (e.g. Wetransfer) 大容量ファイル共有
- Virtual workplace organisational tool (e.g. Slack) バーチャルワークプレイス組織化ツール
- Collaborative source code management (e.g. Github) コラボレーションによるソースコード管理
- do not know/decline to answer わからない/答えたくない
- Other: (please specify) その他 (ご指定ください)

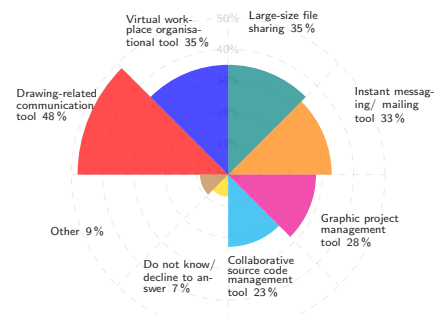



an ONLINE SURVEY オンライン調査

Industry needs analysis on collaboration and integration platforms to manage the design process of digital fabrication  
デジタルファブリケーションの設計プロセスを管理するためのコラボレーション(共に働く)と統合プラットフォームに関する業界の需要分析

PLATFORM-BASED MANAGEMENT REQUIREMENTS プラットフォームの管理要件

C ORGANISATIONAL - PEOPLE SPECIFIC 組織 - 人事

In this section, we would like to understand what organisation (people) related information is needed in the BIM-based design process of digital fabrication.  
ここでは、デジタルファブリケーションのBIMベースの設計プロセスにおいて、どのような組織(人)関連の情報が必要なのかを把握したい。

Please read the definitions to answer the questions below:

DFAB MANAGER refers to the role who defines and manages the strategies of digital fabrication in the design process of a construction project.

DFAB マネージャーとは、建設プロジェクトの設計プロセスにおいて、デジタルファブリケーションの戦略を定義し、管理する役割を指します。

DFAB PROGRAMMER refers to the role who works on the digital fabrication programming in the design process of a construction project

DFAB プログラマーとは、建設プロジェクトの設計プロセスにおいて、デジタルファブリケーションのプログラミングに取り組み役割を指します。

DFAB ENGINEER refers to the role who works on the digital fabrication engineering design in the design process of a construction project.

DFAB エンジニアとは、建設プロジェクトの設計プロセスの中で、デジタルファブリケーションのエンジニアリング設計を担当する役割を指します。

DFAB DESIGN COORDINATOR refers to a role who works on coordinations between the project design and the digital fabrication.

DFAB 設計コーディネーターとは、プロジェクト設計とデジタルファブリケーションとの連携を担当する役割です。

DFAB BIM COORDINATOR refers to a role who works on coordinations between the BIM model(s) and data and the digital fabrication.

DFAB BIM コーディネーターとは、BIMモデルやデータとデジタルファブリケーションとの連携を担当する役割です。

C1 In your opinion, how should following roles participate in the design process of a digital fabrication project?

デジタルファブリケーションプロジェクトの設計プロセスには、以下のような役割がどのように参加すべきだと思いますか? (少なくとも1つの選択肢を選択してください)

|                                                 | DFAB manager             | DFAB programmer          | DFAB engineer            | DFAB design coordinator  | DFAB BIM coordinator     |
|-------------------------------------------------|--------------------------|--------------------------|--------------------------|--------------------------|--------------------------|
| As an external consultant 外部コンサルタントとして          | <input type="checkbox"/> |
| As member of the architect team 建築家チームのメンバーとして  | <input type="checkbox"/> |
| As member of the engineer team エンジニアチームのメンバーとして | <input type="checkbox"/> |
| As member of the GC team 工事ゼネコンチームのメンバーとして      | <input type="checkbox"/> |
| As member of the client team クライアントチームの一員として    | <input type="checkbox"/> |
| No participation is necessary 参加の必要はありません       | <input type="checkbox"/> |
| do not know/decline to answer わからない/答えたくない      | <input type="checkbox"/> |
| Other (please specify) その他(ご指定ください)             |                          |                          |                          |                          |                          |

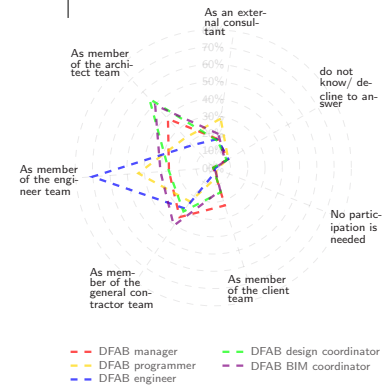

C2 When are the following roles required in the design process of digital fabrication projects?

次のような役割が設計プロセスに参加するのはいつですか? (少なくとも1つの選択肢を選択してください)

|                                            | DFAB Manager             | DFAB programmer          | DFAB engineer            | DFAB design coordinator  | DFAB BIM coordinator     |
|--------------------------------------------|--------------------------|--------------------------|--------------------------|--------------------------|--------------------------|
| Strategic Definition 建築相談                  | <input type="checkbox"/> |
| Feasibility Study 基本設計                     | <input type="checkbox"/> |
| Schematic Design 基本設計                      | <input type="checkbox"/> |
| Detailed Design 実施設計                       | <input type="checkbox"/> |
| Technical Design 実施設計                      | <input type="checkbox"/> |
| Documentation 実施設計                         | <input type="checkbox"/> |
| Construction 工事整理                          | <input type="checkbox"/> |
| Handover 完了検査                              | <input type="checkbox"/> |
| Operation 建物使用                             | <input type="checkbox"/> |
| Not required なくてもいい                        | <input type="checkbox"/> |
| do not know/decline to answer わからない/答えたくない | <input type="checkbox"/> |

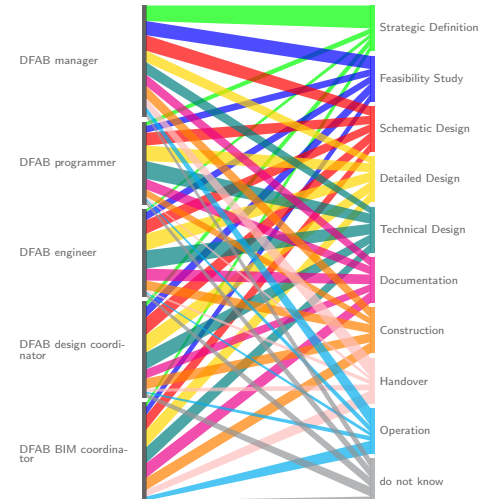

Industry needs analysis on collaboration and integration platforms to manage the design process of digital fabrication  
デジタルファブリケーションの設計プロセスを管理するためのコラボレーション(共に働く)と統合プラットフォームに関する業界の需要分析

PLATFORM-BASED MANAGEMENT REQUIREMENTS プラットフォームの管理要件

D CONTRACTUAL - ACCOUNTABILITY SPECIFIC 契約 - 条項と責任

In this section, we would like to understand what is needed in a construction contract to help facilitate platform-based integration in the BIM-based design process.  
ここでは、BIMベースの設計プロセスにおけるプラットフォームベースの統合を促進するために、建設プロジェクトの契約書に何が 필요한かを理解しておきたい。

D1 How should software/platform(s) and data format(s) be included in the project contract? (please tick min:1, max:3 boxes)

- プラットフォームとデータフォーマットはプロジェクト契約にどのように含めるべきですか? (最小:1つ、最大:3つのオプションを選択してください)
- One single software/platform should be explicitly specified in a basic clause since a project begins プロジェクトが開始されてから契約で指定された1つの単一プラットフォーム
  - A list of software/platforms should be explicitly specified as options in a basic clause since a project begins プロジェクトが開始されてから契約で指定された1つのプラットフォーム一覧
  - A list of documentation data formats should be specified in a basic clause since the project begins プロジェクトが開始されてから契約の基本条項で指定された1つのデータフォーマット一覧
  - A list of documentation data formats should be specified in an ad-hoc clause in the mid-stage of the design process アドホック条項で指定された1つのデータフォーマット一覧
  - No software should be included in the contract 契約書にソフトが含まれていないこと
  - No data format should be included in the contract 契約書にデータフォーマットを記載しないこと
  - do not know/decline to answer わからない/答えたくない
  - Other: (please specify) その他(ご指定ください)

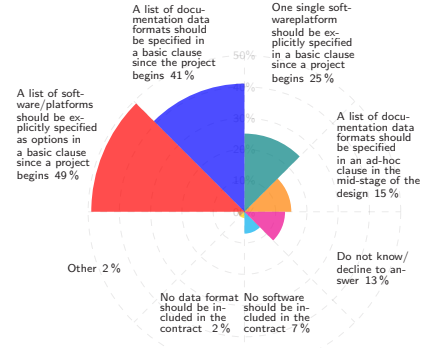

D2 What documentation format(s) should be included in the project contract for digital fabrication in the design process? (please tick min:1, max:3 boxes)

- デジタルファブリケーションの設計段階で、プロジェクト契約書には、ドキュメンテーションフォーマットを含めるべきですか? (最小:1つ、最大:3つのオプションを選択してください)
- Specification text with the general fabrication intents 一般的な意図を持つ仕様書のテキスト
  - Specification text with specific fabrication information 具体的な意図が記載された仕様書
  - Universal codes applicable for a wide range of fabrication approach 製造アプローチの広い範囲に適用可能なユニバーサルコード
  - Process simulation and virtual commissioning information プロセスシミュレーションとバーチャル試運転情報
  - Fabrication specified model ontology and configuration (e.g. families, types and schedules) ファブリケーション指定モデルのオントロジーと構成
  - Fabrication-ready codes matching the specified fabrication method(s) 指定された製造方法に合致した加工対応コード
  - do not know/decline to answer わからない/答えたくない
  - Other: (please specify) その他(ご指定ください)

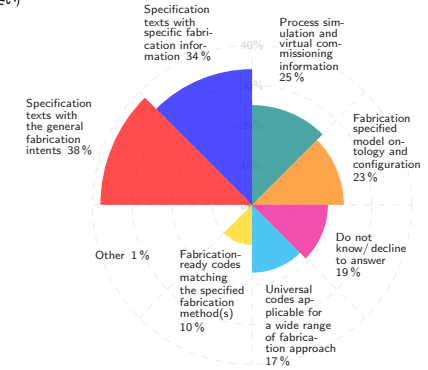

D3 With what management model(s) should the following be owned and managed within the platform? (please tick min:1, max:3 boxes)

プラットフォーム内では、以下をどのように管理すべきでしょうか? (最小:1つ、最大:3つのオプションを選択してください)

Management model terminology 経営モデル用語

Centralised model - everything within the platform is owned and managed by one firm throughout the project period (e.g. by the client or a project manager)

中央集権型 - プロジェクト期間中、プラットフォーム内のすべてのもののひとつの会社が所有し、管理します(クライアントやプロジェクトマネージャーなど)

Semi-centralised model - everything within the platform is owned and managed by one firm who is leading the stage, where each stage in the design process can have a different owner

半中央集権型 - 各設計段階では、プラットフォーム内のすべてのものは、その段階をリードしているの会社が所有し、管理しています。

Decentralised model - firms are organised in clusters and each cluster has a firm to own and manage the data among the firms in that cluster

地方分権型 - 企業はクラスターで組織され、各クラスターにはそのクラスター内の会社でデータを所有し、管理する企業がある。

Discrete model - each firm owns and manages their own data within the platform

離散型 - 各企業は、プラットフォーム内で独自のデータを所有し、管理しています。

Distributed model - all firms own everything shared within the platform

分散型 - プラットフォーム内で共有されているすべてのものをすべての企業が所有しています。

Exclusive model - only one set of data is allowed to be shared in the platform, which is owned and managed by the project client

排他的型 - プロジェクトクライアントが所有・管理するプラットフォームでは一つのデータセットのみを共有することが許可されています。

|                                             | Centralised<br>中央集権型     | Sem-centralised<br>半中央集権型 | Decentralised<br>地方分権型   | Discrete<br>離散型          | Distributed<br>分散型       | Exclusive<br>排他的型        | do not know/decline to answer<br>わからない/答えたくない |
|---------------------------------------------|--------------------------|---------------------------|--------------------------|--------------------------|--------------------------|--------------------------|-----------------------------------------------|
| Design model(s) & data 設計モデルとデータ            | <input type="checkbox"/> | <input type="checkbox"/>  | <input type="checkbox"/> | <input type="checkbox"/> | <input type="checkbox"/> | <input type="checkbox"/> | <input type="checkbox"/>                      |
| Fabrication information 製造情報                | <input type="checkbox"/> | <input type="checkbox"/>  | <input type="checkbox"/> | <input type="checkbox"/> | <input type="checkbox"/> | <input type="checkbox"/> | <input type="checkbox"/>                      |
| Intellectual property of all data 全データの知的財産 | <input type="checkbox"/> | <input type="checkbox"/>  | <input type="checkbox"/> | <input type="checkbox"/> | <input type="checkbox"/> | <input type="checkbox"/> | <input type="checkbox"/>                      |

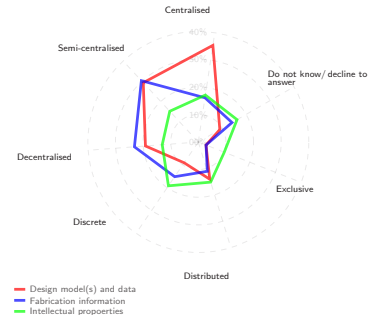

Industry needs analysis on collaboration and integration platforms to manage the design process of digital fabrication  
 デジタルファブリケーションの設計プロセスを管理するためのコラボレーション(共に働く)と統合プラットフォームに関する業界の需要分析

PLATFORM-BASED MANAGEMENT REQUIREMENTS プラットフォームの管理要件

E BUSINESS MODEL - PLATFORM SPECIFIC ビジネスモデル - プラットフォーム

In this section, we would like to understand what should the business model of such a platform be, for managing design for digital fabrication.  
 ここでは、デジタルファブリケーションのためのデザインを管理するための協働プラットフォームのビジネスモデルを理解したい。

E1 What would be the key benefits if a collaboration platform for BIM-based design projects existed? (please tick min:1, max: 3 boxes)

- 設計プロセスの中で、BIMプラットフォームがあるとしたら、主なメリットは何ですか? (最小:1つ、最大:3つのオプションを選択してください)
- Digitisation and computational advancements デジタル化と計算の進歩
  - Value adding and waste reduction in design and construction processes 設計施工プロセスにおける付加価値と廃棄物削減
  - Risk management リスク管理
  - Integrate supply-chains and spur systemic innovations サプライチェーンを統合し、システムの革新に拍車をかける
  - Maximise profit and return of investment 利益と投資収益率の最大化
  - Solve complex design problems 複雑な設計の問題を解決する
  - Enhance sustainable development opportunities 持続可能な開発機会の強化
  - Contemplating the future of work (e.g. automation in construction) 仕事の未来を考える(建設業の自動化など)
  - do not know/decline to answer わからない/答えたくない
  - Other: (please specify) その他(ご指定ください)

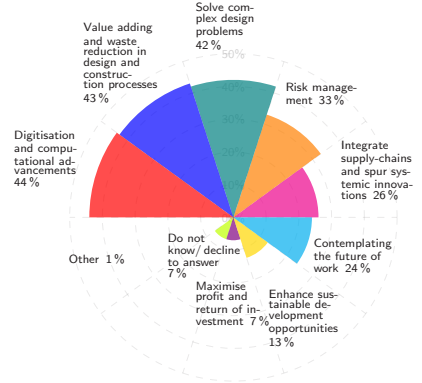

E2 What is/are ideal for a platform to be accessed and financially funded? (please tick min:1, max:3 boxes)

プラットフォームへのアクセスや資金調達の理想的な方法とは? (最小:1つ、最大:3つのオプションを選択してください)

- Charging user's subscription ユーザーのサブスクリプション有料
- No charge for project usage; funded by one of the project stakeholders (e.g. the client, the fabricator trade) 一般利用は無料、プロジェクトの1人が資金を提供する(例: クライアントの取引)
- Partially open-source; no charge for general usage, but charging for upgraded services 一部オープンソース、一般利用は無料、アップグレードサービスは有料
- Partially open-source; no charge for general usage, but payments come from special one-off service market place 一部オープンソース、一般利用は無料、支払いは特別なワンオフサービスのから
- Completely open-source; no charge for project usage, fully funded by donations, foundation and institute business model (e.g. Blender) 完全なオープンソース、プロジェクト利用料無料、寄付金、財団、研究所のビジネスモデル
- Completely open-source; no charge for project usage; fully funded by commercial advertisements on the platform 完全なオープンソース、プロジェクト利用料無料、プラットフォーム上の商業広告で完全に賄われています
- do not know/decline to answer わからない/答えたくない
- Other: (please specify) その他(ご指定ください)

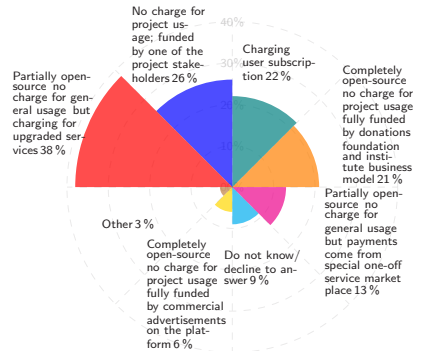

E3 What are the key risks of a platform in projects? (please tick min:1, max: 3 boxes)

プロジェクトにおけるプラットフォームの重要なリスクとは? (最小:1つ、最大:3つのオプションを選択してください)

- Cost constraints コスト制約
- Project liability disputes プロジェクト責任紛争
- Human resources (e.g. software developers) 人材(ソフトウェア開発者など)
- Uncertainties in digital fabrication implementation in the industry (e.g. sceptical attitude of project stakeholders) 業界におけるデジタルファブリケーションの実施における不確実性
- Unstable market demands 不安定な市場の需要
- Market competitions 市場競争
- do not know/decline to answer わからない/答えたくない
- Other: (please specify) その他(ご指定ください)

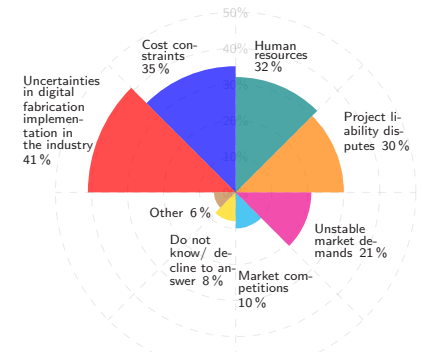

Supplement: supplemental_materials_me.1943-5479.0001072_ng.pdf [file supplemental_materials_me.1943-5479.0001072_ng.pdf]
